# Supplementary material for: Identification and Validation of an Annexin-Related Prognostic Signature and Therapeutic Targets for Bladder Cancer: Integrative Analysis
Source: MDPI journal article supplement (doi:10.3390/biology11020259), 2022-02-07
Supplement: s1 [file s1]

**Table S1.** Clinical characteristics of the BC patients collected in this study

| Data source | Platform         | Sample size | Age   | No. of death | Media (OS) | Gender (% Male) | Stage (%I/II/III/IV/NA <sup>a</sup> ) | Survival terms    |
|-------------|------------------|-------------|-------|--------------|------------|-----------------|---------------------------------------|-------------------|
| TCGA        | Illumina HiSeqV2 | 407         | 69±11 | 155          | 16.93      | 73.71           | 0.49/31.70/34.40/32.92/0.49           | OS, DSS, DFI, PFI |
| GSE31684    | GPL570           | 93          | 69±10 | 65           | 31.31      | 71.12           | 16.13/18.28/45.16/20.43/0.00          | OS, DSS, DFI, PFI |
| GSE32548    | GPL6947          | 130         | 70±11 | 25           | 53.77      | 76.15           | 70.00/29.23/0.00/0.00/0.77            | OS, DSS, DFI, PFI |
| GSE48075    | GPL6947          | 73          | 69±10 | 45           | 30.40      | -               | -                                     | OS                |
| Total       |                  | 703         |       | 290          |            |                 |                                       |                   |

Note: NA<sup>a</sup>: Not Available; '-': no data; overall survival (OS), disease specific survival (DSS), disease free interval (DFI), and progression free interval (PFI) were defined by [1].

### Reference

1. Liu, J.; Lichtenberg, T.; Hoadley, K.A.; Poisson, L.M.; Lazar, A.J.; Cherniack, A.D.; Kovatich, A.J.; Benz, C.C.; Levine, D.A.; Lee, A.V.; et al. An Integrated TCGA Pan-Cancer Clinical Data Resource to Drive High-Quality Survival Outcome Analytics. *Cell* **2018**, *173*, 400–416.e11.

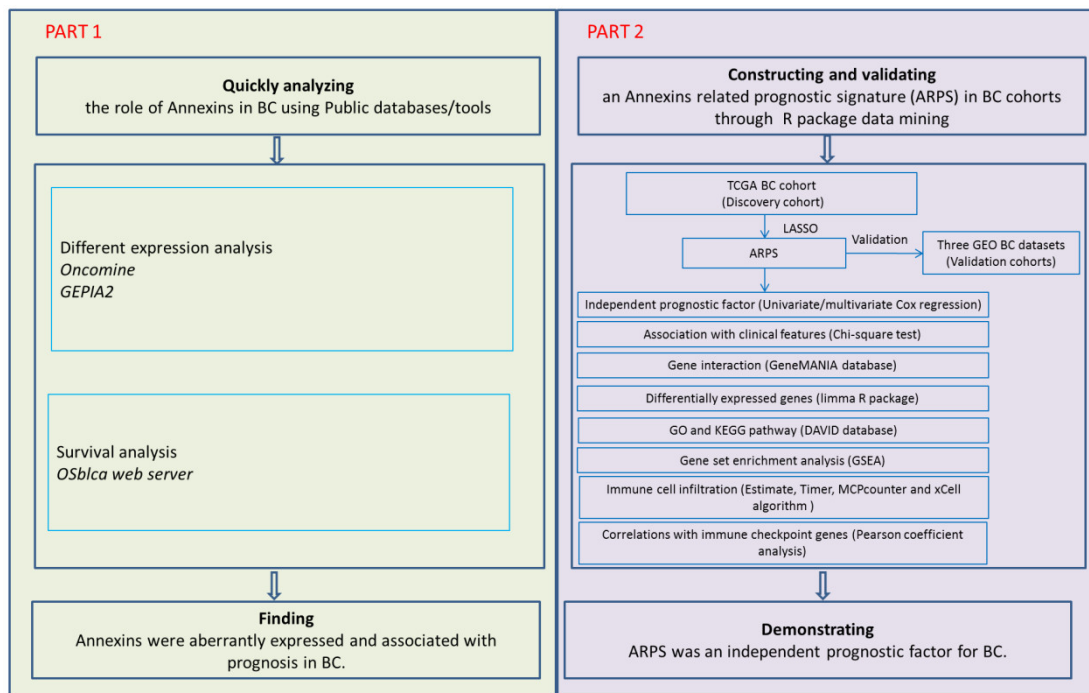

**Figure S1.** The work-flow of our study.

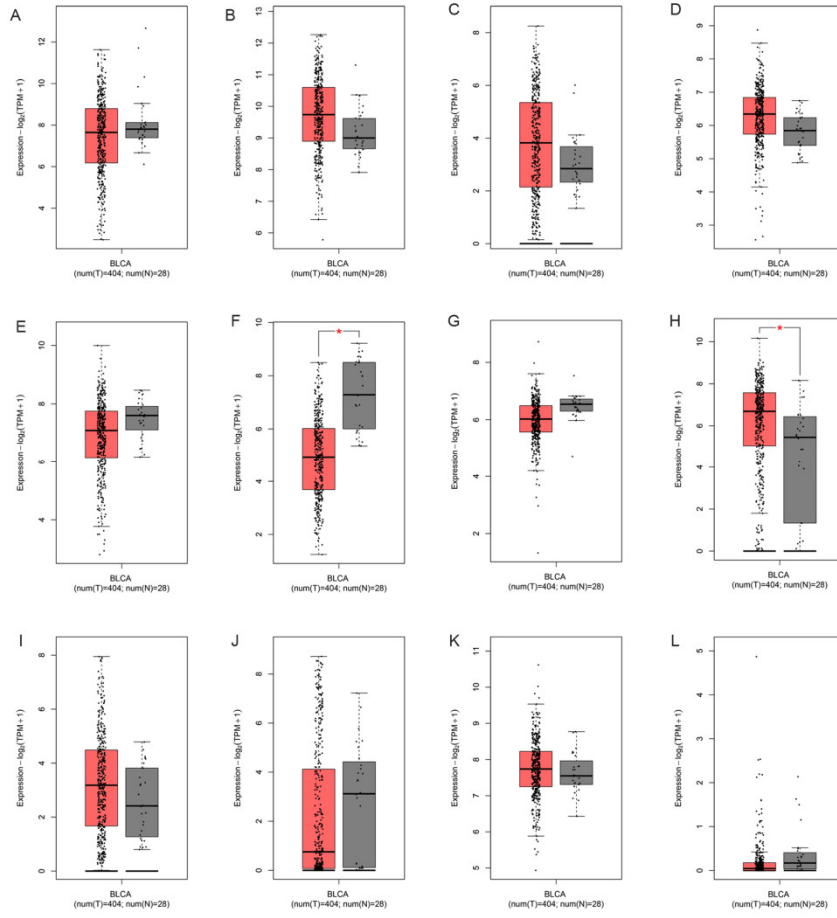

**Figure S2.** Comparison of mRNA expression of Annexins family members between bladder cancer and adjacent normal tissues (GEPIA2). ANXA1-11 (A-K) and ANXA13 (L); where \*p < 0.05.

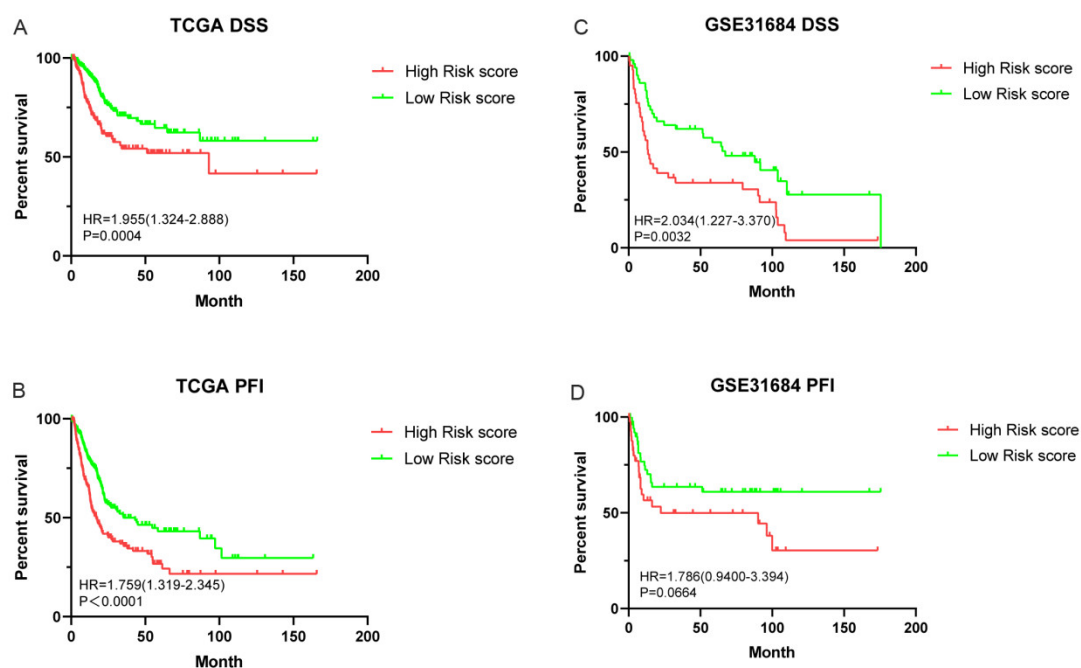

**Figure S3.** Survival analyses of ARPS regarding Disease Free Interval (DSS) and Progression Free Interval (PFI) in TCGA (A-B) and GSE31684 (C-D) BC cohorts.
